# Supplementary material
Source: bioRxiv or medRxiv preprint supplement (https://www.biorxiv.org/highwire/filestream/57174/field_highwire_adjunct_files/1/189076-2.pdf)

H3K4me1

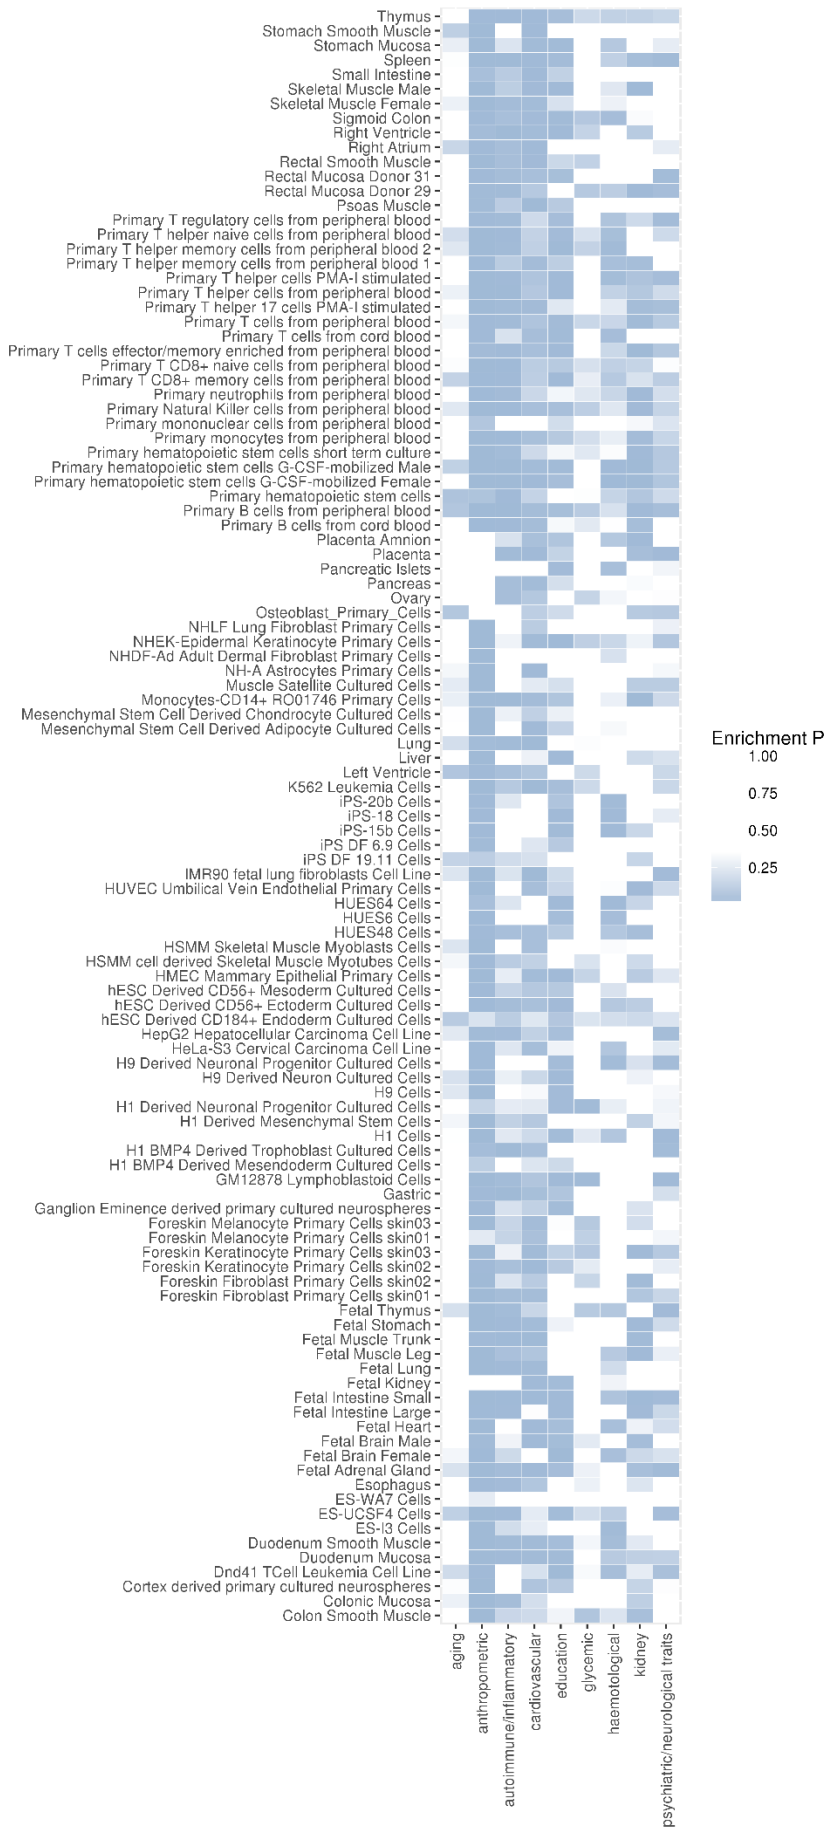









# H3K27me3

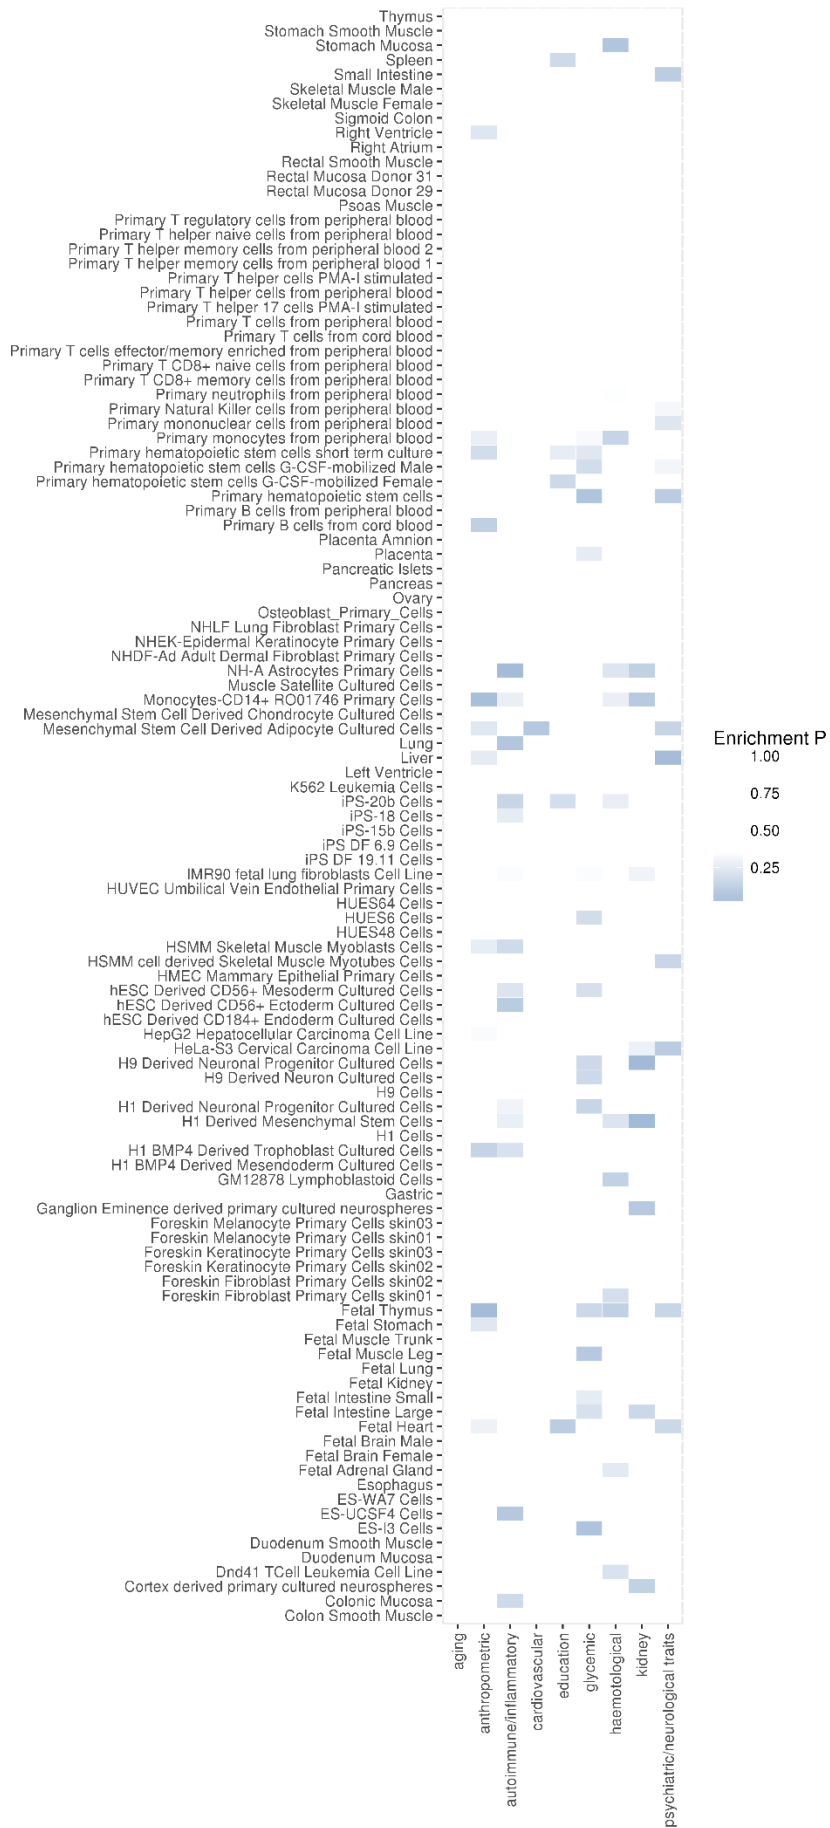

# H3K36me3

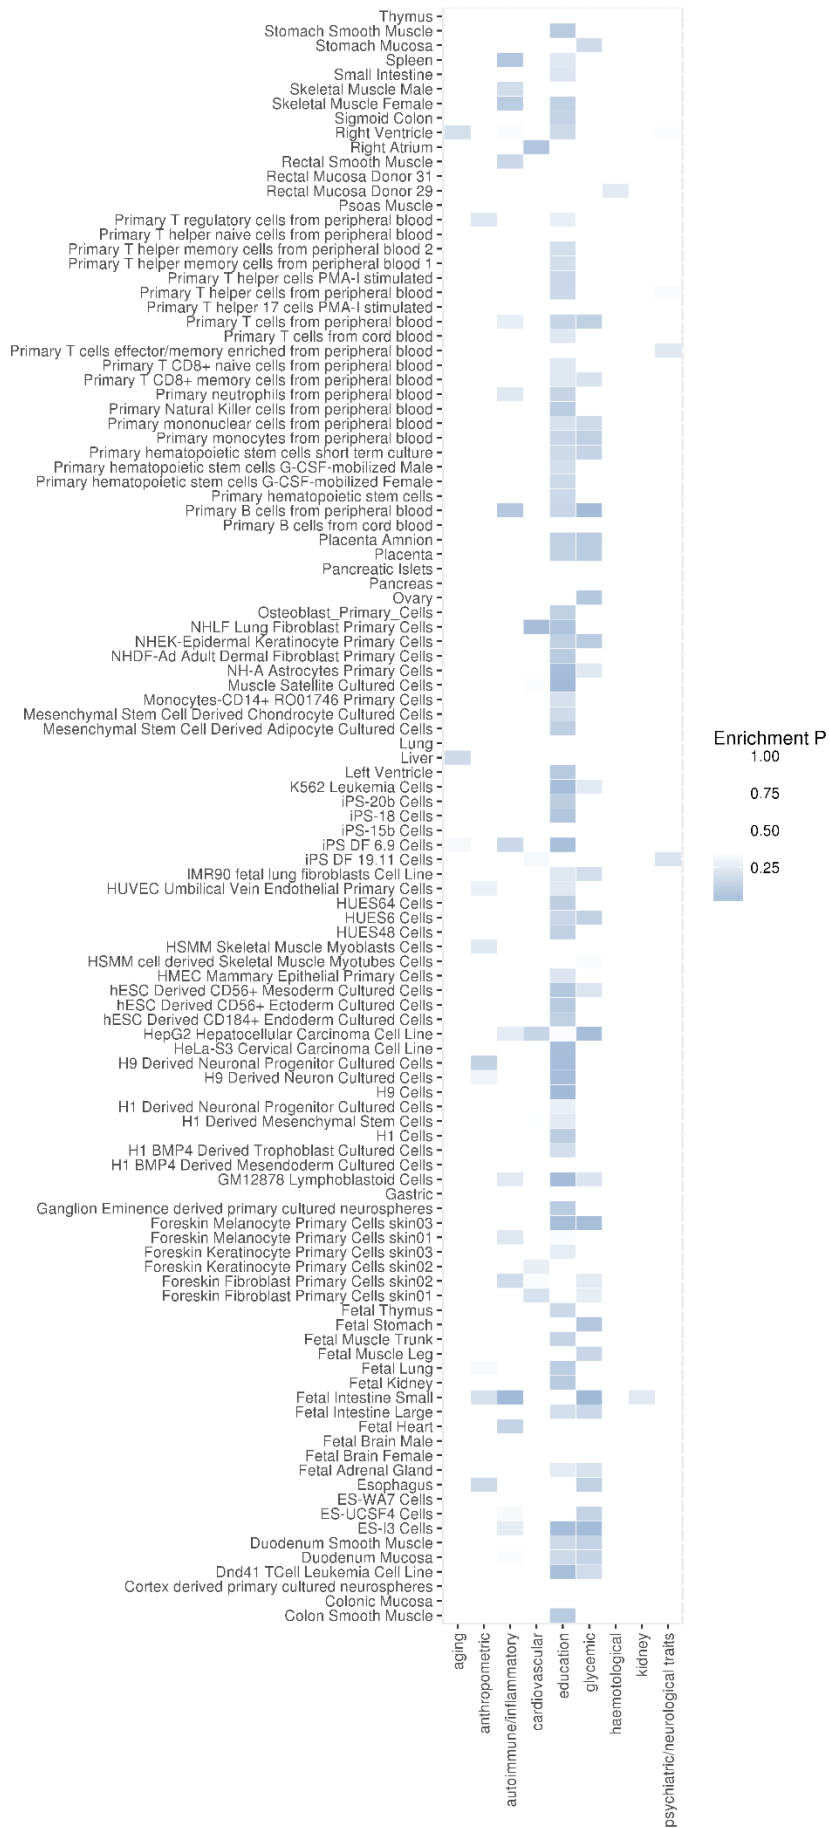

Supplement: Supplementary file [file 189076-2.pdf]
